# Supplementary material for: Lower adherence to a prudent dietary pattern is associated with earlier age at menarche in adolescents from the Growth and Obesity Chilean Cohort Study
Source: Frontiers journal article supplement (doi:10.3389/fpubh.2022.995593), 2023-01-30

## *Supplementary Material*

### Supplemental file 1

#### Follow-up sample GOCS

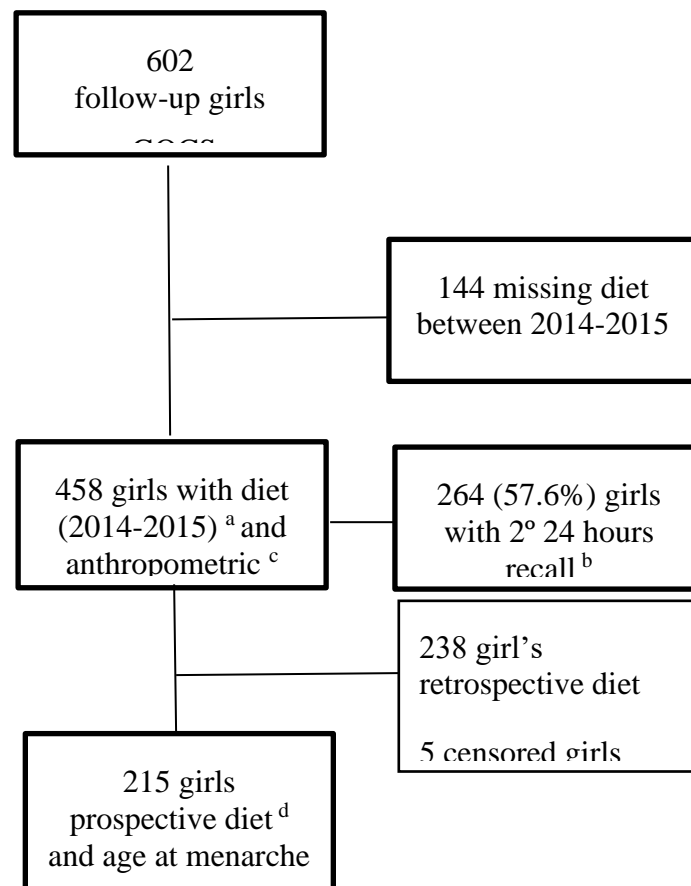

- For the present study, we included all girls that were evaluated between 2014-2015, and who had at least one 24-h recall.
- First and second 24 hours recall.
- Anthropometrics measure before menarche.
- 24 hours recall before outcome (age at menarche)

## Supplemental Files 2

**S2.** Description of the foods that composed each of the 30 food groups included in the factor analysis.

| Food groups         | Food composition                                                                                                                                                                                  |
|---------------------|---------------------------------------------------------------------------------------------------------------------------------------------------------------------------------------------------|
| Low fat milk        | skim milk, skim milk powder, reduced fat milk (2% fat),                                                                                                                                           |
| Whole fat milk      | Fluid whole milk (3% fat), whole milk powder.                                                                                                                                                     |
| Flavored milk       | Mixtures and milk drinks, strawberry, chocolate and other flavors, purchased ready-to-drink                                                                                                       |
| Yogurts             | Yogurt, fermented milk                                                                                                                                                                            |
| Cheeses             | Gouda cheese, ricotta cheese, cream cheese, cheddar cheese,                                                                                                                                       |
| White meat          | poultry, chicken, turkey, fish, viscera (all cooking methods)                                                                                                                                     |
| Red meat            | Steak beef, ground beef, beef ribs, pork chop, pork ribs, pork loin,                                                                                                                              |
| Cold cuts           | Ham, bologna, turkey breast, chicken breast, salami                                                                                                                                               |
| Processed meats     | Sausage, sausages, frankfurters, meatballs ready for consumption, nuggets,<br>hamburger ready for consumption (only meat).                                                                        |
| Junk food           | Pizzas, sandwiches of meat or hamburger ready to eat, french fries, wonton, egg roll, chilean hot dog, <i>sopaipillas</i> ,<br><i>tacos</i> , <i>empanadas</i> . Mainly, street food or fast food |
| Sweetened beverages | Juice or flavored drink, purchased ready-to-drink, juice or flavored drink, dry mix - unprepared                                                                                                  |
| Soft drinks         | Soda pop or soft drink regular or diet                                                                                                                                                            |
| Coffee and tea      | Coffee, instant coffee, herbal tea, tea bag                                                                                                                                                       |
| Bread               | French bread, bun bread, white bread with salt                                                                                                                                                    |

|                                       |                                                                                                                                                                                                                                                                                                                                                                                   |
|---------------------------------------|-----------------------------------------------------------------------------------------------------------------------------------------------------------------------------------------------------------------------------------------------------------------------------------------------------------------------------------------------------------------------------------|
| Ready to eat cereal                   | Breakfast cereals                                                                                                                                                                                                                                                                                                                                                                 |
| Rice, potato and pasta                | Rice, cooked potatoes, mashed potatoes, pasta and dishes pasta.                                                                                                                                                                                                                                                                                                                   |
| Vegetables                            | Lettuce, cabbage, raw salad, others load vegetables. Pumpkin, carrot, cucumber, tomato, among others.                                                                                                                                                                                                                                                                             |
| Fruits                                | Pineapple, banana, orange, apple, pear, papaya, mango, watermelon, tangerine, grape, blueberry, strawberry, blackberry, fruit salad, fruit juices                                                                                                                                                                                                                                 |
| Eggs                                  | Fried eggs, scrambled eggs, omelet, boiled eggs, egg white, egg yolk                                                                                                                                                                                                                                                                                                              |
| Homemade dishes                       | Typical chilean food or meals prepared at home, restaurants or schools; that require a longer preparation time and made with natural foods. For instance: Beans, lentils, chickpeas, white beans, legumes-based preparations, vegetables stews with or without meat, <i>cazuela</i> , <i>charquican</i> , <i>chapsui</i> , <i>humitas</i> , <i>pastel de choclo</i> among others. |
| Soup                                  | Dry soup, bouillon, consommé.                                                                                                                                                                                                                                                                                                                                                     |
| Cracker and salt snack                | Crackers, saltine or soda, salty chips - snack type, cheese balls, puffs or twists, potato chips                                                                                                                                                                                                                                                                                  |
| Chocolates and confectionary          | Chocolate candy, chocolate candy bar, sweets based on milk, lollipop, candy, caramel, jams, <i>dulce de leche</i>                                                                                                                                                                                                                                                                 |
| Cookies and Cake                      | Cookies and bars, granola bars, sweet biscuit and cookie stuffed, cookie sandwich, cookies commercial packaged, Cakes, cheesecake, cake sponge, doughnut, muffins, pies fruit, cupcake, cake purchased ready-to-eat                                                                                                                                                               |
| Desserts and ice cream                | Pudding, flan, mousse, gelatin dessert, chilean desserts, fruit canned with syrup, ice cream and frozen desserts, Popsicle                                                                                                                                                                                                                                                        |
| Sugar                                 | White sugar                                                                                                                                                                                                                                                                                                                                                                       |
| Chocolate powder                      | Cocoa powder, chocolate powder                                                                                                                                                                                                                                                                                                                                                    |
| Butter and margarine                  | Salted butter, unsalted butter, salted margarine, unsalted margarine, light margarine                                                                                                                                                                                                                                                                                             |
| Oil, lemon, salt, vinegar (for salad) | Soybean oil, sunflower oil, vegetal oil, olive oil, salt, vinegar, lemon juice to salad                                                                                                                                                                                                                                                                                           |
| Mayonnaise, ketchup                   | Mayonnaise or mayo type dressing, ketchup, mustard, soy sauce                                                                                                                                                                                                                                                                                                                     |

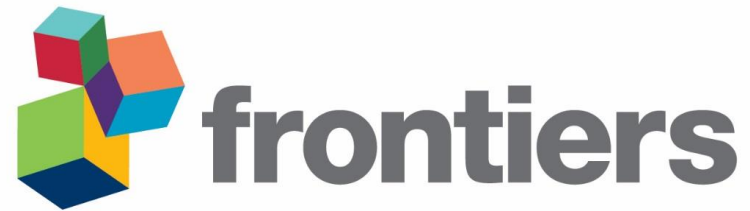

Supplement: Data_Sheet_1.PDF [file Data_Sheet_1.PDF]
